# Supplementary material
Source: HighWire-hosted journal article supplement (https://erj.ersjournals.com/content/57/1/2000670)
Supplement: inline-supplementary-material-2 [file inline-supplementary-material-2.pdf]

## SUPPLEMENTARY TABLES (ST)

**Manuscript Title:** Earlier diagnosis of lung cancer in a randomised trial of an autoantibody blood test followed by imaging. The Early Diagnosis of Lung Cancer Scotland (ECLS) Team

### Table of Contents:

|                                                                                                                                                     |        |
|-----------------------------------------------------------------------------------------------------------------------------------------------------|--------|
| Supplementary Table S1. Assessment Schedule for Participants in the Intervention Group                                                              | ST. 2  |
| Supplementary Table S2. Baseline Questionnaires for Participants                                                                                    | ST. 3  |
| Supplementary Table S3. Estimation of Cost Per Early Stage Lung Cancer Case Detected Per One Thousand Participants Screened                         | ST. 20 |
| Supplementary Data Pack S1. Primary Outcome Analysis                                                                                                | ST. 21 |
| Supplementary Data Pack S2. Analysis of Primary Outcome for Participants with Records in the Last Two Years of the Trial Period (Subgroup Analysis) | ST. 24 |
| Supplementary Data Pack S3. Secondary Outcome Analyses (Mortality- Lung Cancer, Cancer, All-Cause)                                                  | ST. 26 |

**Supplementary Table S1.** Assessment Schedule for Participants in the Intervention Group

| Procedure                | Visit 1 | ≤ 2 weeks | CT scan follow-up schedule (± 4 weeks) |           |           |           |
|--------------------------|---------|-----------|----------------------------------------|-----------|-----------|-----------|
|                          |         |           | 6 months                               | 12 months | 18 months | 24 months |
| EarlyCDT-Lung Blood Test | x       |           |                                        |           |           |           |
| Chest X-Ray              |         | x         |                                        |           |           |           |
| CT Scan *                |         | x         | x                                      | x         | x         | x         |

\* Study CT scan follow-up was carried out only if the EarlyCDT-Blood test result was positive. If a participant entered NHS Clinical Care pathway, then their subsequent study CT scans were cancelled.

**Supplementary Table S2. Baseline Questionnaires for Participants**

|                                                        |
|--------------------------------------------------------|
| Baseline Questionnaire V (Part A)                      |
| Hospital Anxiety and Depression Scale (HADS) (Part B)  |
| Positive and Negative Affect Schedule (PANAS) (Part C) |
| Views about Lung Cancer (Part D, E)                    |
| Views about Health (Part F)                            |
| Medical History (G)                                    |
| Smoking Behaviour (Part H)                             |

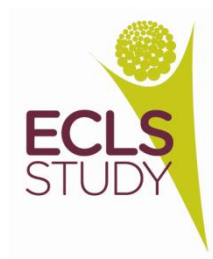

# Participant Questionnaire

Cohort ID:

|      |   |  |  |  |  |  |  |
|------|---|--|--|--|--|--|--|
| ECLS | — |  |  |  |  |  |  |
|------|---|--|--|--|--|--|--|

Participant Initials:

|  |  |  |
|--|--|--|
|  |  |  |
|--|--|--|

Please tell us the date you filled in this questionnaire:

|   |   |   |   |   |   |   |   |   |   |
|---|---|---|---|---|---|---|---|---|---|
| D | D | — | M | M | — | Y | Y | Y | Y |
|---|---|---|---|---|---|---|---|---|---|

This participant has been allocated to group:

TEST

|  |
|--|
|  |
|--|

NO TEST

|  |
|--|
|  |
|--|

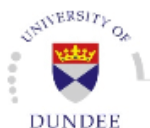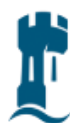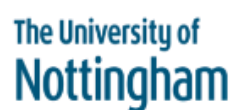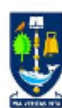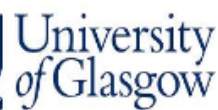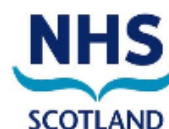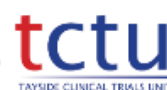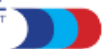

## PART A

By placing a tick in one box in each group below, please indicate which statements best describe your own health state today.

---

### Mobility

- |                                       |                          |
|---------------------------------------|--------------------------|
| I have no problems in walking about   | <input type="checkbox"/> |
| I have some problems in walking about | <input type="checkbox"/> |
| I am confined to bed                  | <input type="checkbox"/> |

---

### Self-Care

- |                                                 |                          |
|-------------------------------------------------|--------------------------|
| I have no problems with self-care               | <input type="checkbox"/> |
| I have some problems washing or dressing myself | <input type="checkbox"/> |
| I am unable to wash or dress myself             | <input type="checkbox"/> |

---

### Usual Activities (e.g. work, study, housework, family or leisure activities)

- |                                                          |                          |
|----------------------------------------------------------|--------------------------|
| I have no problems with performing my usual activities   | <input type="checkbox"/> |
| I have some problems with performing my usual activities | <input type="checkbox"/> |
| I am unable to perform my usual activities               | <input type="checkbox"/> |

---

### Pain/Discomfort

- |                                    |                          |
|------------------------------------|--------------------------|
| I have no pain or discomfort       | <input type="checkbox"/> |
| I have moderate pain or discomfort | <input type="checkbox"/> |
| I have extreme pain or discomfort  | <input type="checkbox"/> |

---

### Anxiety/Depression

- |                                      |                          |
|--------------------------------------|--------------------------|
| I am not anxious or depressed        | <input type="checkbox"/> |
| I am moderately anxious or depressed | <input type="checkbox"/> |
| I am extremely anxious or depressed  | <input type="checkbox"/> |

To help people say how good or bad a health state is, we have drawn a scale (rather like a thermometer) on which the best state you can imagine is marked 100 and the worst state you can imagine is marked 0.

We would like you to indicate on this scale how good or bad your own health is today, in your opinion. Please do this by drawing a line from the box below to whichever point on the scale indicates how good or bad your health state is today.

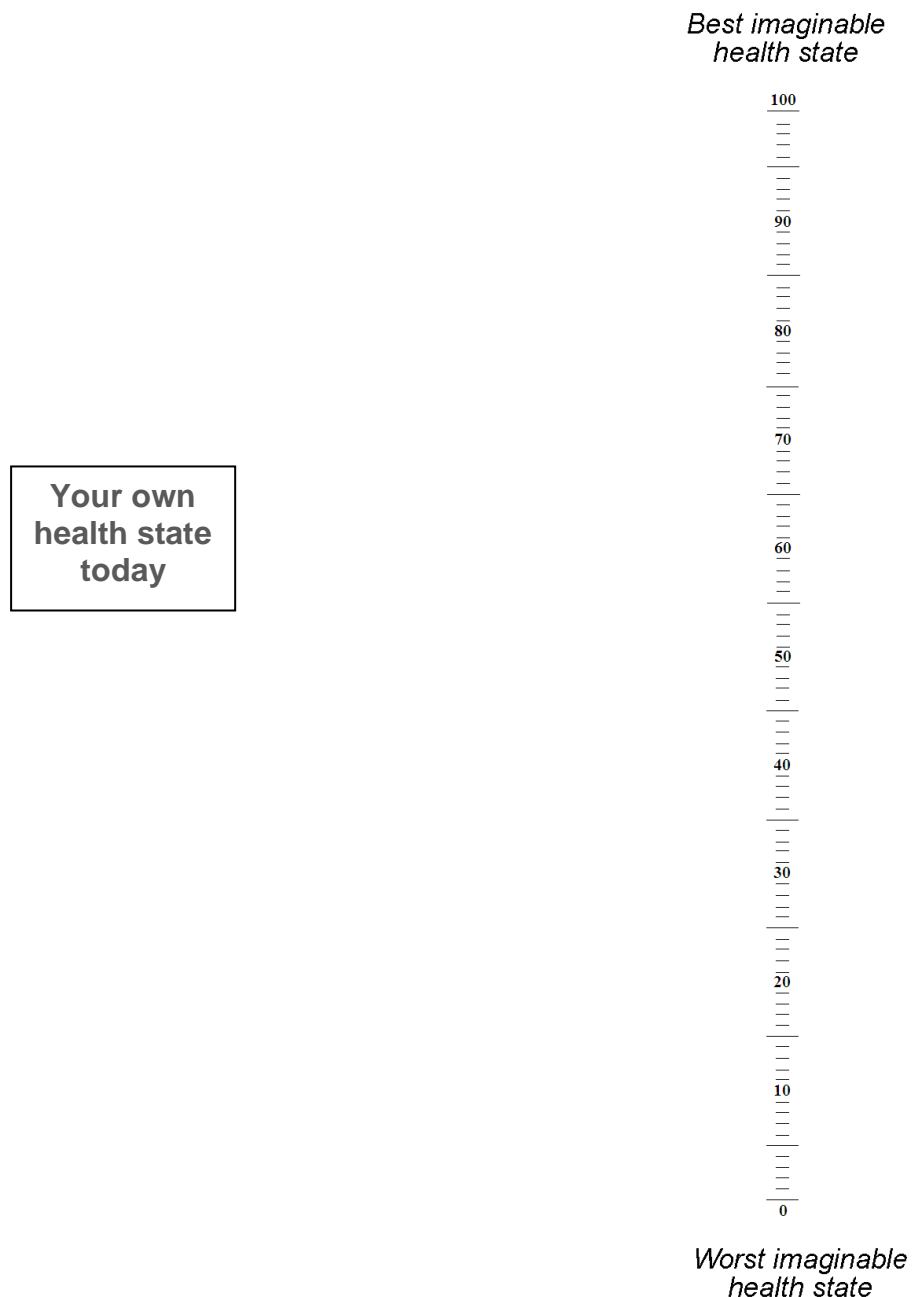

## PART B

This questionnaire is designed to help us know how you feel. Read each item and place a tick opposite the reply which comes closest to **how you have been feeling in the past week**.

Don't take too long over your replies: your immediate reaction to each item will probably be more accurate than a long thought-out response. ***Tick only one answer in each section.***

### I feel tense or 'wound up':

Most of the time ☐  
 A lot of the time ☐  
 Time to time, Occasionally ☐  
 Not at all ☐

### I feel as if I am slowed down:

Nearly all the time ☐  
 Very often ☐  
 Sometimes ☐  
 Not at all ☐

### I still enjoy the things I used to enjoy:

Definitely as much ☐  
 Not quite so much ☐  
 Only a little ☐  
 Hardly at all ☐

### I get a sort of frightened feeling like "butterflies" in the stomach:

Not at all ☐  
 Occasionally ☐  
 Quite often ☐  
 Very often ☐

### I get a sort of frightened feeling as if something awful is about to happen:

Very definitely and quite badly ☐  
 Yes, but not too badly ☐  
 A little, but it doesn't worry me ☐  
 Not at all ☐

### I have lost interest in my appearance:

Definitely ☐  
 I don't take as much care as I should ☐  
 I may not take quite as much care ☐  
 I take just as much care as ever ☐

### I can laugh and see the funny side of things:

As much as I always could ☐  
 Not quite so much now ☐  
 Definitely not so much now ☐  
 Not at all ☐

### I feel restless as if I have to be on the move:

Very much indeed ☐  
 Quite a lot ☐  
 Not very much ☐  
 Not at all ☐

**Worrying thoughts go through my mind:**

A great deal of the time ☐

A lot of the time ☐

From time to time but not too often ☐

Only occasionally ☐

**I look forward with enjoyment to things:**

As much as I ever did ☐

Rather less than I used to ☐

Definitely less than I used to ☐

Hardly at all ☐

**I feel cheerful:**

Not at all ☐

Not often ☐

Sometimes ☐

Most of the time ☐

**I get sudden feelings of panic:**

Very often indeed ☐

Quite often ☐

Not very often ☐

Not at all ☐

**I can sit at ease and feel relaxed:**

Definitely ☐

Usually ☐

Not often ☐

Not at all ☐

**I can enjoy a good book or radio or TV programme:**

Often ☐

Sometimes ☐

Not often ☐

Very seldom ☐



## PART C

This questionnaire lists a number of words that people often use to describe different feelings and emotions. Read each item and then tick the appropriate answer in the space next to the word. **Indicate the extent you have felt this way over the past week.**

|     |              | Very slightly<br>or not at all | A little                 | Moderately               | Quite a bit              | Extremely                |
|-----|--------------|--------------------------------|--------------------------|--------------------------|--------------------------|--------------------------|
| 1)  | Interested   | <input type="checkbox"/>       | <input type="checkbox"/> | <input type="checkbox"/> | <input type="checkbox"/> | <input type="checkbox"/> |
| 2)  | Distressed   | <input type="checkbox"/>       | <input type="checkbox"/> | <input type="checkbox"/> | <input type="checkbox"/> | <input type="checkbox"/> |
| 3)  | Excited      | <input type="checkbox"/>       | <input type="checkbox"/> | <input type="checkbox"/> | <input type="checkbox"/> | <input type="checkbox"/> |
| 4)  | Upset        | <input type="checkbox"/>       | <input type="checkbox"/> | <input type="checkbox"/> | <input type="checkbox"/> | <input type="checkbox"/> |
| 5)  | Strong       | <input type="checkbox"/>       | <input type="checkbox"/> | <input type="checkbox"/> | <input type="checkbox"/> | <input type="checkbox"/> |
| 6)  | Guilty       | <input type="checkbox"/>       | <input type="checkbox"/> | <input type="checkbox"/> | <input type="checkbox"/> | <input type="checkbox"/> |
| 7)  | Scared       | <input type="checkbox"/>       | <input type="checkbox"/> | <input type="checkbox"/> | <input type="checkbox"/> | <input type="checkbox"/> |
| 8)  | Hostile      | <input type="checkbox"/>       | <input type="checkbox"/> | <input type="checkbox"/> | <input type="checkbox"/> | <input type="checkbox"/> |
| 9)  | Enthusiastic | <input type="checkbox"/>       | <input type="checkbox"/> | <input type="checkbox"/> | <input type="checkbox"/> | <input type="checkbox"/> |
| 10) | Proud        | <input type="checkbox"/>       | <input type="checkbox"/> | <input type="checkbox"/> | <input type="checkbox"/> | <input type="checkbox"/> |
| 11) | Irritable    | <input type="checkbox"/>       | <input type="checkbox"/> | <input type="checkbox"/> | <input type="checkbox"/> | <input type="checkbox"/> |
| 12) | Alert        | <input type="checkbox"/>       | <input type="checkbox"/> | <input type="checkbox"/> | <input type="checkbox"/> | <input type="checkbox"/> |
| 13) | Ashamed      | <input type="checkbox"/>       | <input type="checkbox"/> | <input type="checkbox"/> | <input type="checkbox"/> | <input type="checkbox"/> |
| 14) | Inspired     | <input type="checkbox"/>       | <input type="checkbox"/> | <input type="checkbox"/> | <input type="checkbox"/> | <input type="checkbox"/> |
| 15) | Nervous      | <input type="checkbox"/>       | <input type="checkbox"/> | <input type="checkbox"/> | <input type="checkbox"/> | <input type="checkbox"/> |
| 16) | Determined   | <input type="checkbox"/>       | <input type="checkbox"/> | <input type="checkbox"/> | <input type="checkbox"/> | <input type="checkbox"/> |
| 17) | Attentive    | <input type="checkbox"/>       | <input type="checkbox"/> | <input type="checkbox"/> | <input type="checkbox"/> | <input type="checkbox"/> |
| 18) | Jittery      | <input type="checkbox"/>       | <input type="checkbox"/> | <input type="checkbox"/> | <input type="checkbox"/> | <input type="checkbox"/> |
| 19) | Active       | <input type="checkbox"/>       | <input type="checkbox"/> | <input type="checkbox"/> | <input type="checkbox"/> | <input type="checkbox"/> |
| 20) | Afraid       | <input type="checkbox"/>       | <input type="checkbox"/> | <input type="checkbox"/> | <input type="checkbox"/> | <input type="checkbox"/> |

From "Development and validation of brief measures of positive and negative affect: The PANAS scales," by D. Watson, L. A. Clark, and A. Tellegen, 1988, Journal of Personality and Social Psychology, 54, 1063-1070. Copyright © 1988 by the American Psychological Association. Reproduced with permission. No further reproduction or distribution is permitted without written permission from the American Psychological Association.

## PART D

We are interested in your personal views about **lung cancer**.

Please indicate how much you agree or disagree with the statements below by ticking the box that best describes your views.

|           | <b>VIEWS ABOUT LUNG CANCER</b>                                                                                                                                                                                 | Strongly agree | Agree | Neutral | Disagree | Strongly disagree |
|-----------|----------------------------------------------------------------------------------------------------------------------------------------------------------------------------------------------------------------|----------------|-------|---------|----------|-------------------|
| <b>1</b>  | <b>What I do can affect my risk of getting lung cancer</b>                                                                                                                                                     |                |       |         |          |                   |
| <b>2</b>  | <b>When I think about my risk of getting lung cancer I get upset</b>                                                                                                                                           |                |       |         |          |                   |
| <b>3</b>  | <b>I do not know how likely it is that I might get lung cancer</b>                                                                                                                                             |                |       |         |          |                   |
| <b>4</b>  | <b>Finding lung cancer early can improve my chances of survival</b>                                                                                                                                            |                |       |         |          |                   |
| <b>5</b>  | <b>Lung cancer would have a big impact on my life</b>                                                                                                                                                          |                |       |         |          |                   |
| <b>6</b>  | <b>Lung cancer lasts for a long time</b>                                                                                                                                                                       |                |       |         |          |                   |
| <b>7</b>  | <b>A blood screening test can accurately detect lung cancer</b>                                                                                                                                                |                |       |         |          |                   |
| <b>8.</b> | <p><b>Please list in rank-order the three most important factors that you believe cause lung cancer.</b></p> <p><b>The most important causes for me are:-</b></p> <p>1. ....</p> <p>2. ....</p> <p>3. ....</p> |                |       |         |          |                   |

## PART E

1. What are the chances that **you** will develop lung cancer over the next five years?  
(Please tick one box)

- |                                         |                          |
|-----------------------------------------|--------------------------|
| Approximately 1 in 1000 (0.1%)          | <input type="checkbox"/> |
| Approximately 1 in 500 (0.2%)           | <input type="checkbox"/> |
| Approximately 1 in 250 (0.4%)           | <input type="checkbox"/> |
| Approximately 1 in 100 (1%)             | <input type="checkbox"/> |
| Approximately 1 in 20 (5%)              | <input type="checkbox"/> |
| Approximately 1 in 10 (10%), or greater | <input type="checkbox"/> |
| Don't know                              | <input type="checkbox"/> |

2. **Compared to other people of** your age and sex, how likely are **you** to develop lung cancer over the next 5 years? (Please tick one box)

- |                                     |                          |
|-------------------------------------|--------------------------|
| A lot less likely than other people | <input type="checkbox"/> |
| Less likely than other people       | <input type="checkbox"/> |
| About as likely as other people     | <input type="checkbox"/> |
| More likely than other people       | <input type="checkbox"/> |
| Much more likely than other people  | <input type="checkbox"/> |
| Don't know                          | <input type="checkbox"/> |

## PART F

Please read the following statements carefully and decide to what extent it is a **characteristic of you at the moment**. Please **tick one** of the responses to each question.

|                                                   | Not at all               | Slightly                 | Somewhat                 | Moderately               | Very                     |
|---------------------------------------------------|--------------------------|--------------------------|--------------------------|--------------------------|--------------------------|
| 1) I feel anxious when I think about my health    | <input type="checkbox"/> | <input type="checkbox"/> | <input type="checkbox"/> | <input type="checkbox"/> | <input type="checkbox"/> |
| 2) I rarely become discouraged about my health    | <input type="checkbox"/> | <input type="checkbox"/> | <input type="checkbox"/> | <input type="checkbox"/> | <input type="checkbox"/> |
| 3) I am pleased with how well and healthy I feel  | <input type="checkbox"/> | <input type="checkbox"/> | <input type="checkbox"/> | <input type="checkbox"/> | <input type="checkbox"/> |
| 4) I have positive feeling about my health        | <input type="checkbox"/> | <input type="checkbox"/> | <input type="checkbox"/> | <input type="checkbox"/> | <input type="checkbox"/> |
| 5) I feel that I have handled my health very well | <input type="checkbox"/> | <input type="checkbox"/> | <input type="checkbox"/> | <input type="checkbox"/> | <input type="checkbox"/> |

Below are four questions asking you about how worried you are about **lung cancer** at the moment. Please **tick one** of the responses to each question.

### How worried are you about getting lung cancer someday?

|                             |                          |
|-----------------------------|--------------------------|
| Not at all worried          | <input type="checkbox"/> |
| Rarely worried              | <input type="checkbox"/> |
| Sometimes worried           | <input type="checkbox"/> |
| Often worried               | <input type="checkbox"/> |
| Worried almost all the time | <input type="checkbox"/> |

### How much does your worry affect your mood?

|                     |                          |
|---------------------|--------------------------|
| Not at all          | <input type="checkbox"/> |
| A little            | <input type="checkbox"/> |
| Somewhat            | <input type="checkbox"/> |
| A lot               | <input type="checkbox"/> |
| Almost all the time | <input type="checkbox"/> |

### How much does your worry affect your ability to perform your daily activities?

|                     |                          |
|---------------------|--------------------------|
| Not at all          | <input type="checkbox"/> |
| A little            | <input type="checkbox"/> |
| Sometimes           | <input type="checkbox"/> |
| A lot               | <input type="checkbox"/> |
| Almost all the time | <input type="checkbox"/> |

### What is your current level of anxiety about the results of future tests/treatments?

|                             |                          |
|-----------------------------|--------------------------|
| Not at all anxious          | <input type="checkbox"/> |
| A little anxious            | <input type="checkbox"/> |
| Somewhat anxious            | <input type="checkbox"/> |
| Anxious a lot               | <input type="checkbox"/> |
| Anxious almost all the time | <input type="checkbox"/> |

## PART G

Below are some questions about medications and OTHER treatments you may be receiving.

**1) Have you been prescribed any medications to help you with low mood (e.g., anxiety, depression) in the last 3 months?**

Yes ☐ No ☐

**If YES, please go to Question 1a)**

**If NO, please go to Question 2**

**1 a) If YES, please state the name of the medication:\_\_\_\_\_**

**2) Are you currently taking any medications to help you with low mood (e.g., anxiety, depression)?**

Yes ☐ No ☐

**If YES, please go to Question 2 a)**

**If NO, please go to Question 3**

**2 a) If YES, please state the name of the medication:\_\_\_\_\_**

**3) Are you currently being investigated for any other conditions?**

Yes ☐ No ☐

**If YES, please answer questions 3 a) and 3 b)**

**If NO, please go to PART H**

**3 a) If YES, please describe what investigations you are having and why**

---

---

---

**3 b) How worried are you about these other investigations at the moment?**

|                    |                          |
|--------------------|--------------------------|
| Not at all worried | <input type="checkbox"/> |
| A little worried   | <input type="checkbox"/> |
| Quite worried      | <input type="checkbox"/> |
| Very worried       | <input type="checkbox"/> |

## Part H

This study is not about trying to encourage people to stop smoking but we are still interested in your smoking behaviour and your views about smoking.

**1) Not counting the last week, have you smoked any cigarettes or tobacco in the last 6 months?**

Yes ☐ No ☐

---

**2) Have you smoked any cigarettes or tobacco in the last seven days / week?**

Yes ☐ No ☐

**If YES, please go to Question 3**  
**If NO, please go to PART I**

---

**3) How soon after you wake up do you smoke your first cigarette or tobacco? (Tick one box)**

After 60 minutes ☐

31 to 60 minutes ☐

6 to 30 minutes ☐

Within 5 minutes ☐

---

**4) On average, how many cigarettes do you smoke each day? (Enter a number)**

**5) Do you have any intention of giving up smoking in the next four weeks?  
(Tick one box)**

- |                 |                          |
|-----------------|--------------------------|
| Yes, definitely | <input type="checkbox"/> |
| Yes, probably   | <input type="checkbox"/> |
| Don't know      | <input type="checkbox"/> |
| Probably not    | <input type="checkbox"/> |
| Definitely not  | <input type="checkbox"/> |
- 

**6) How sure or confident are you that if you tried, you could give up smoking for good? (Tick one box)**

- |                  |                          |
|------------------|--------------------------|
| Very certain     | <input type="checkbox"/> |
| Fairly certain   | <input type="checkbox"/> |
| Don't know       | <input type="checkbox"/> |
| Fairly uncertain | <input type="checkbox"/> |
| Very uncertain   | <input type="checkbox"/> |
- 

**7) Which one of these statements do you most strongly agree with?  
(Tick one box)**

- |                                                    |                          |
|----------------------------------------------------|--------------------------|
| I would like to keep on smoking                    | <input type="checkbox"/> |
| I don't really want to stop smoking                | <input type="checkbox"/> |
| I don't know whether I want to stop smoking or not | <input type="checkbox"/> |
| I don't really want to carry on smoking            | <input type="checkbox"/> |
| I would like to stop smoking                       | <input type="checkbox"/> |

**8) Which one of these statements do you most strongly agree with?  
(Tick one box)**

- |                                                     |                          |
|-----------------------------------------------------|--------------------------|
| I never think about stopping smoking                | <input type="checkbox"/> |
| One day I will need to think about stopping smoking | <input type="checkbox"/> |
| I should stop smoking but I don't think I'm ready   | <input type="checkbox"/> |
| I am starting to think about how I can smoke less   | <input type="checkbox"/> |
| I am trying to stop smoking                         | <input type="checkbox"/> |
- 

**9) How strongly do you agree or disagree with the statement "My health will improve if I stop smoking." (Tick one box)**

- |                   |                          |
|-------------------|--------------------------|
| Disagree strongly | <input type="checkbox"/> |
| Disagree          | <input type="checkbox"/> |
| Don't know        | <input type="checkbox"/> |
| Agree             | <input type="checkbox"/> |
| Agree strongly    | <input type="checkbox"/> |
- 

**10) How strongly do you agree or disagree with the statement "People who are important to me want me to stop smoking." (Tick one box)**

- |                   |                          |
|-------------------|--------------------------|
| Disagree strongly | <input type="checkbox"/> |
| Disagree          | <input type="checkbox"/> |
| Don't know        | <input type="checkbox"/> |
| Agree             | <input type="checkbox"/> |
| Agree strongly    | <input type="checkbox"/> |
- 

**11) In the LAST 6 MONTHS have you tried to cut down the number of cigarettes**



**you smoke?**

Yes ☐ No ☐

---

**12) In the LAST 6 MONTHS have you tried to stop smoking?**

Yes ☐ No ☐

**Please continue to the next page.**

## PART I

Please tell us a little more about yourself. Your answers to these questions will be very helpful to us and will be stored using a unique study code from which you cannot be identified.

1) Date of birth --

2) Age at which you left full-time education

---

### 3) Marital Status:

|                                  |                          |           |                          |
|----------------------------------|--------------------------|-----------|--------------------------|
| Single                           | <input type="checkbox"/> | Widowed   | <input type="checkbox"/> |
| In a relationship                | <input type="checkbox"/> | Separated | <input type="checkbox"/> |
| Married / in a civil partnership | <input type="checkbox"/> | Divorced  | <input type="checkbox"/> |

---

### 4) Which best describes your work situation?

|                                             |                                |
|---------------------------------------------|--------------------------------|
| In paid employment                          | <input type="checkbox"/>       |
| Unable to work due to illness or disability | <input type="checkbox"/>       |
| Unemployed and looking for work             | <input type="checkbox"/>       |
| At home and not looking for work            | <input type="checkbox"/>       |
| Retired                                     | <input type="checkbox"/>       |
| Other (please describe)                     | <input type="checkbox"/> _____ |

---

### 5) Do you own or rent your home?

|                         |                                |
|-------------------------|--------------------------------|
| Rented                  | <input type="checkbox"/>       |
| Owned or mortgaged      | <input type="checkbox"/>       |
| Other (Please say what) | <input type="checkbox"/> _____ |

**6) The total number of people (adults + children) living in my home is:**

(Please give a number) \_\_\_\_\_

**7) The total number of rooms (excluding halls, landings, toilets and bathrooms) in my home is**

(Please give a number) \_\_\_\_\_

**8) How many cars or vans are available for use by one or more members of your household?**

None ☐

One or more ☐

**9) Ethnic Origin:**

| I would describe my ethnic origin as:                                                                                                                                                                 |                                                                                                                                                                                                                     |                                                                                                                                                                                         |
|-------------------------------------------------------------------------------------------------------------------------------------------------------------------------------------------------------|---------------------------------------------------------------------------------------------------------------------------------------------------------------------------------------------------------------------|-----------------------------------------------------------------------------------------------------------------------------------------------------------------------------------------|
| <b>Asian or Asian British</b><br>Bangladeshi <input type="checkbox"/><br>Indian <input type="checkbox"/><br>Pakistani <input type="checkbox"/><br>Any other Asian background <input type="checkbox"/> | <b>Mixed</b><br>White & Asian <input type="checkbox"/><br>White & Black African <input type="checkbox"/><br>White & Black Caribbean <input type="checkbox"/><br>Any other mixed background <input type="checkbox"/> | <b>Other Ethnic Group</b><br>Chinese <input type="checkbox"/><br>Any other ethnic group (Give details):<br>_____<br>I do not wish to disclose my ethnic origin <input type="checkbox"/> |
| <b>Black or Black British</b><br>African <input type="checkbox"/><br>Caribbean <input type="checkbox"/><br>Any other Black background <input type="checkbox"/>                                        | <b>White</b><br>Scottish <input type="checkbox"/><br>Other White British <input type="checkbox"/><br>Irish <input type="checkbox"/><br>Any other White background <input type="checkbox"/>                          |                                                                                                                                                                                         |

**Thank you for completing this questionnaire.**

**Supplementary Table S3.** Estimation of Cost Per Early Stage Lung Cancer Case Detected Per One Thousand Participants Screened.

|                                           | <b>Screening</b><br><i>Mean (95% CI)</i> | <b>No screening</b><br><i>Mean (95% CI)</i> | <b>Difference</b><br><i>Mean (95% CI)</i> |
|-------------------------------------------|------------------------------------------|---------------------------------------------|-------------------------------------------|
| <b>Base case analysis</b>                 |                                          |                                             |                                           |
| Costs (£)                                 | 163,000 (159,000 – 167,000)              | 12,100 (9990 – 14,400)                      | 151,000 (148,000 – 155,000)               |
| Early stage LCs detected                  | 4.19 (3.02, 5.62)                        | 2.89 (1.91, 4.09)                           | 1.3 (-0.15, 2.77)                         |
| ICER                                      |                                          |                                             | 116 000 (54 900, dominated)               |
| <b>Deterministic sensitivity analysis</b> |                                          |                                             |                                           |
| Prevalence (0.5%)                         |                                          |                                             |                                           |
| Costs (£)                                 | 157,000                                  | 5810                                        | 151,000                                   |
| Early stage LCs detected                  | 2.01                                     | 1.39                                        | 0.6                                       |
| ICER                                      |                                          |                                             | 242,000                                   |
| Prevalence (2%)                           |                                          |                                             |                                           |
| Costs (£)                                 | 175,000                                  | 23,300                                      | 151,000                                   |
| Early stage LCs detected                  | 8.06                                     | 5.56                                        | 2.5                                       |
| ICER                                      |                                          |                                             | 60,500                                    |
| EarlyCDT cost (£58.00)                    |                                          |                                             |                                           |
| Costs (£)                                 | 116,000                                  | 12,100                                      | 104,000                                   |
| Early stage LCs detected                  | 4.19                                     | 2.89                                        | 1.3                                       |
| ICER                                      |                                          |                                             | 79 700                                    |
| EarlyCDT cost (£200.50)                   |                                          |                                             |                                           |
| Costs (£)                                 | 258,000                                  | 12,100                                      | 246,000                                   |
| Early stage LCs detected                  | 4.19                                     | 2.89                                        | 1.3                                       |
| ICER                                      |                                          |                                             | 189,000                                   |

**Legend:** ICER- Incremental cost effectiveness ratio; LC- Lung cancer; CI- Confidence interval.

**Note:** Dominated is when the intervention arm is more costly and less effective than the control arm

## Supplementary Data Pack S1:

### Primary Outcome Analysis: Diagnosis of Stage III/IV/Unspecified Lung Cancer Two Years after Randomisation

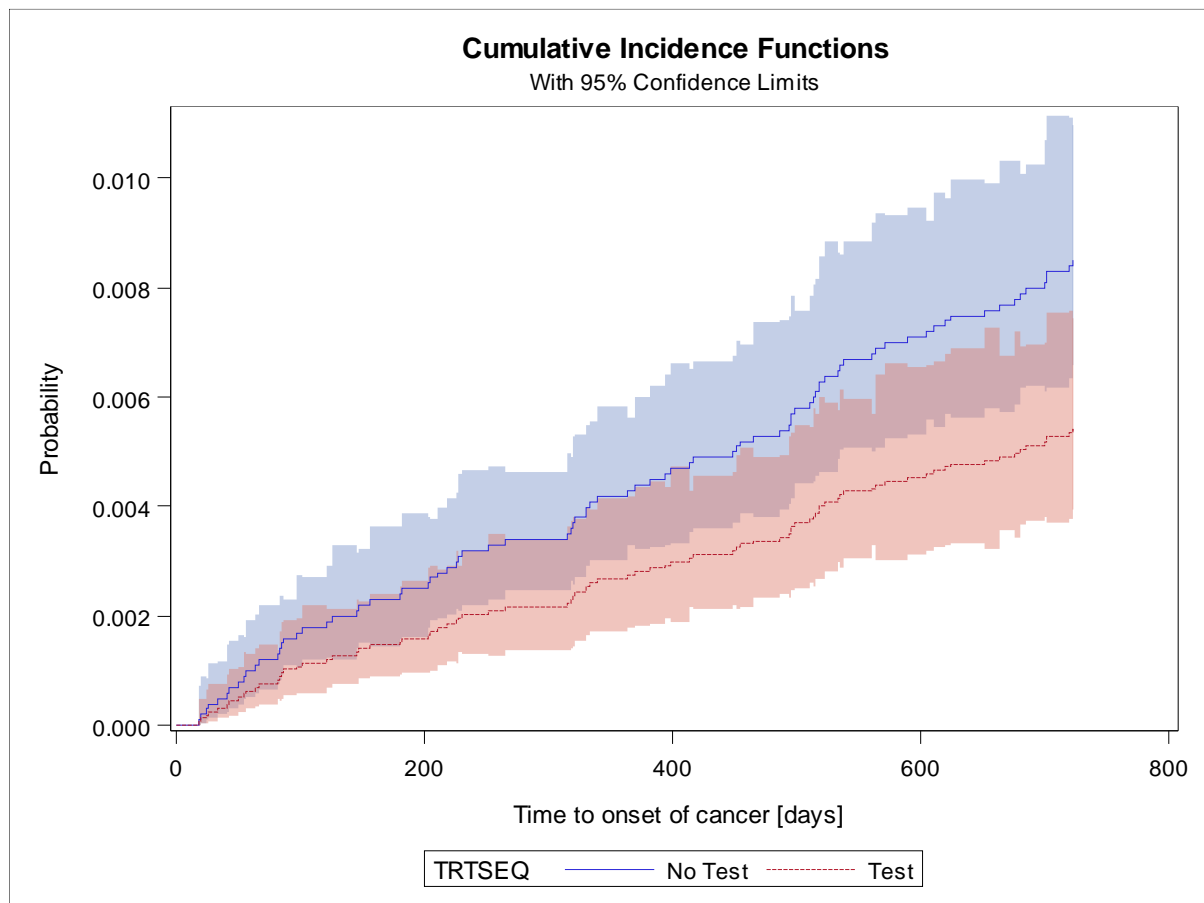

#### First incidence of late stage lung cancer in the 2 years since randomisation

|          | No Test |          | Test |          | Total |          |
|----------|---------|----------|------|----------|-------|----------|
| Variable | N       | (%)      | N    | (%)      | N     | (%)      |
| No       | 6069    | (99.2%)  | 6054 | (99.5%)  | 12123 | (99.3%)  |
| Yes      | 52      | (0.8%)   | 33   | (0.5%)   | 85    | (0.7%)   |
| Total    | 6121    | (100.0%) | 6087 | (100.0%) | 12208 | (100.0%) |

#### Lung cancer staging (numeric)

|             | No Test |          | Test |          | Total |          |
|-------------|---------|----------|------|----------|-------|----------|
| Variable    | N       | (%)      | N    | (%)      | N     | (%)      |
| No cancer   | 6069    | (99.2%)  | 6054 | (99.5%)  | 12123 | (99.3%)  |
| Unspecified | 7       | (0.1%)   | 0    | (0.0%)   | 7     | (0.1%)   |
| Stage 3     | 17      | (0.3%)   | 15   | (0.2%)   | 32    | (0.3%)   |
| Stage 4     | 28      | (0.5%)   | 18   | (0.3%)   | 46    | (0.4%)   |
| Total       | 6121    | (100.0%) | 6087 | (100.0%) | 12208 | (100.0%) |

| Chi-Square Statistics       |        |         |
|-----------------------------|--------|---------|
| Statistic                   | Value  | p-Value |
| Chi-Square                  | 4.1710 | 0.0411  |
| Continuity Adj. Chi-Square  | 3.7382 | 0.0532  |
| Likelihood Ratio Chi-Square | 4.2070 | 0.0403  |
| Mantel-Haenszel Chi-Square  | 4.1706 | 0.0411  |

| Fisher's Exact Test   |        |
|-----------------------|--------|
| Left-sided Pr <= F    | 0.0263 |
| Right-sided Pr >= F   | 0.9846 |
| Table Probability (P) | 0.0108 |
| Two-sided Pr <= P     | 0.0495 |

| Analysis of Maximum Likelihood Estimates |                    |                |              |         |
|------------------------------------------|--------------------|----------------|--------------|---------|
|                                          |                    |                | Type 3 Tests |         |
| Parameter                                | Parameter Estimate | Standard Error | Chi-Square   | p-value |
| Group allocation Test                    | -0.450             | 0.223          | 4.0856       | 0.0432  |

|                       |              | Confidence Interval |       |
|-----------------------|--------------|---------------------|-------|
| Parameter             | Hazard Ratio | lower               | upper |
| Group allocation Test | 0.638        | 0.412               | 0.986 |

| Analysis of Maximum Likelihood Estimates |                    |                |              |         |
|------------------------------------------|--------------------|----------------|--------------|---------|
|                                          |                    |                | Type 3 Tests |         |
| Parameter                                | Parameter Estimate | Standard Error | Chi-Square   | p-value |
| Age [years]                              | 0.112              | 0.018          | 39.4211      | <.0001  |
| Pack year history                        | 0.013              | 0.003          | 18.8157      | <.0001  |
| Gender Male                              | 0.144              | 0.226          | 0.4050       | 0.5245  |
| Smoking status Ex-smoker                 | -0.479             | 0.223          | 4.6020       | 0.0319  |
| Group allocation Test                    | -0.440             | 0.223          | 3.9039       | 0.0482  |

|                          |              | Confidence Interval |       |
|--------------------------|--------------|---------------------|-------|
| Parameter                | Hazard Ratio | lower               | upper |
| Age [years]              | 1.119        | 1.080               | 1.159 |
| Pack year history        | 1.013        | 1.007               | 1.019 |
| Gender Male              | 1.155        | 0.741               | 1.800 |
| Smoking status Ex-smoker | 0.619        | 0.400               | 0.959 |
| Group allocation Test    | 0.644        | 0.416               | 0.996 |

## Supplementary Data Pack S2:

Analysis of Primary Outcome for Participants with Records in the Last Two Years of the Trial Period (Post-Hoc Subgroup Analysis)

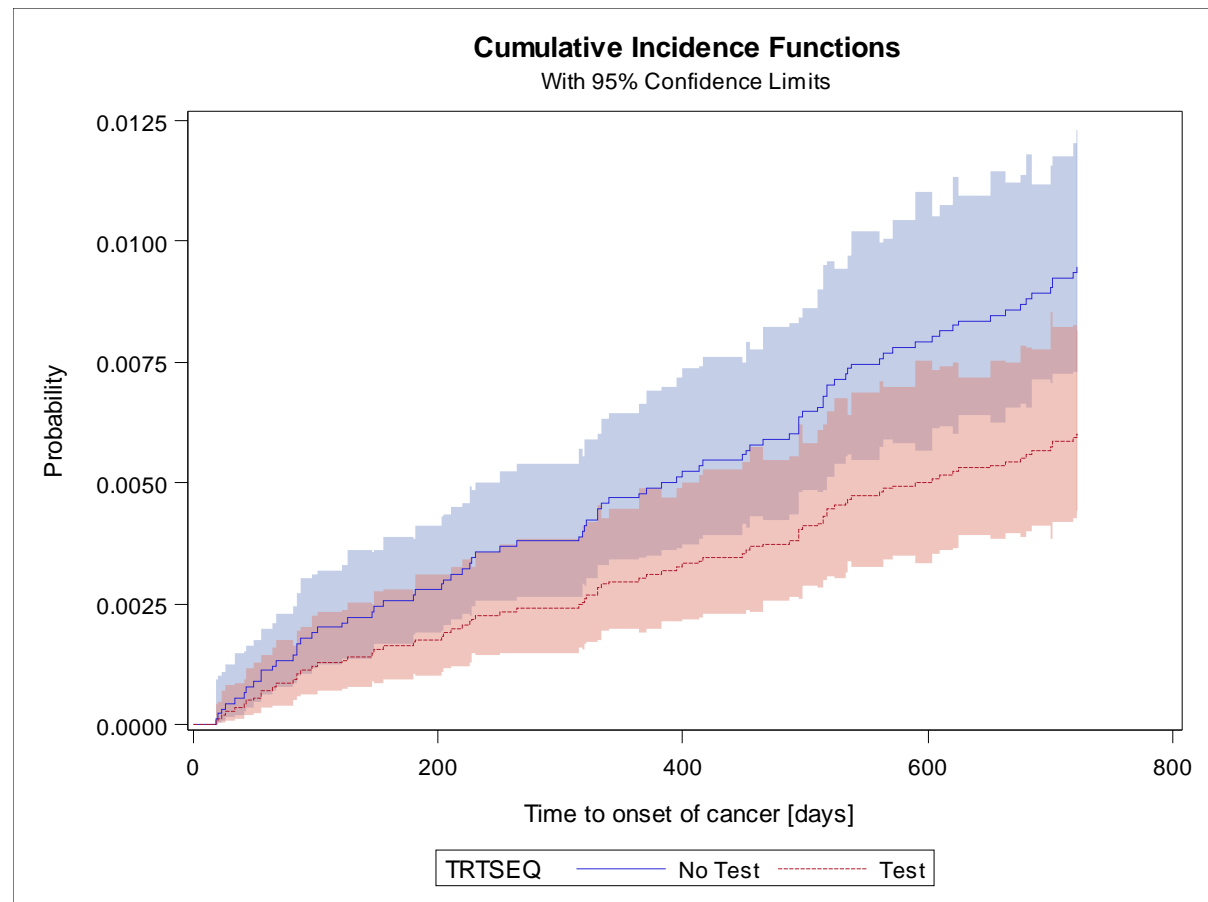

### First incidence of late stage lung cancer in the 2 years since randomisation

|          | No Test |          | Test |          | Total |          |
|----------|---------|----------|------|----------|-------|----------|
| Variable | N       | (%)      | N    | (%)      | N     | (%)      |
| No       | 5432    | (99.1%)  | 5456 | (99.4%)  | 10888 | (99.2%)  |
| Yes      | 52      | (0.9%)   | 33   | (0.6%)   | 85    | (0.8%)   |
| Total    | 5484    | (100.0%) | 5489 | (100.0%) | 10973 | (100.0%) |

### Lung cancer staging (numeric)

|             | No Test |          | Test |          | Total |          |
|-------------|---------|----------|------|----------|-------|----------|
| Variable    | N       | (%)      | N    | (%)      | N     | (%)      |
| No cancer   | 5432    | (99.1%)  | 5456 | (99.4%)  | 10888 | (99.2%)  |
| Unspecified | 7       | (0.1%)   | 0    | (0.0%)   | 7     | (0.1%)   |
| Stage 3     | 17      | (0.3%)   | 15   | (0.3%)   | 32    | (0.3%)   |
| Stage 4     | 28      | (0.5%)   | 18   | (0.3%)   | 46    | (0.4%)   |
| Total       | 5484    | (100.0%) | 5489 | (100.0%) | 10973 | (100.0%) |

| Chi-Square Statistics       |        |         |
|-----------------------------|--------|---------|
| Statistic                   | Value  | p-Value |
| Chi-Square                  | 4.2977 | 0.0382  |
| Continuity Adj. Chi-Square  | 3.8581 | 0.0495  |
| Likelihood Ratio Chi-Square | 4.3338 | 0.0374  |
| Mantel-Haenszel Chi-Square  | 4.2973 | 0.0382  |

| Fisher's Exact Test   |        |
|-----------------------|--------|
| Left-sided Pr <= F    | 0.0244 |
| Right-sided Pr >= F   | 0.9857 |
| Table Probability (P) | 0.0102 |
| Two-sided Pr <= P     | 0.0390 |

| Analysis of Maximum Likelihood Estimates |                    |                |              |         |
|------------------------------------------|--------------------|----------------|--------------|---------|
|                                          |                    |                | Type 3 Tests |         |
| Parameter                                | Parameter Estimate | Standard Error | Chi-Square   | p-value |
| Group allocation Test                    | -0.456             | 0.223          | 4.2061       | 0.0403  |

|                       |              | Confidence Interval |       |
|-----------------------|--------------|---------------------|-------|
| Parameter             | Hazard Ratio | lower               | upper |
| Group allocation Test | 0.634        | 0.410               | 0.980 |

| Analysis of Maximum Likelihood Estimates |                    |                |              |         |
|------------------------------------------|--------------------|----------------|--------------|---------|
|                                          |                    |                | Type 3 Tests |         |
| Parameter                                | Parameter Estimate | Standard Error | Chi-Square   | p-value |
| Age [years]                              | 0.108              | 0.018          | 36.2773      | <.0001  |
| Pack year history                        | 0.015              | 0.004          | 16.1504      | <.0001  |
| Gender Male                              | 0.154              | 0.228          | 0.4550       | 0.5000  |
| Smoking status Ex-smoker                 | -0.443             | 0.225          | 3.8986       | 0.0483  |
| Group allocation Test                    | -0.472             | 0.223          | 4.4963       | 0.0340  |

|                          |              | Confidence Interval |       |
|--------------------------|--------------|---------------------|-------|
| Parameter                | Hazard Ratio | lower               | upper |
| Age [years]              | 1.114        | 1.076               | 1.154 |
| Pack year history        | 1.016        | 1.008               | 1.023 |
| Gender Male              | 1.166        | 0.746               | 1.822 |
| Smoking status Ex-smoker | 0.642        | 0.413               | 0.997 |
| Group allocation Test    | 0.624        | 0.403               | 0.965 |



### Supplementary Data Pack S3: Secondary Outcome Analysis 1: Lung Cancer Mortality Two Years After Randomisation

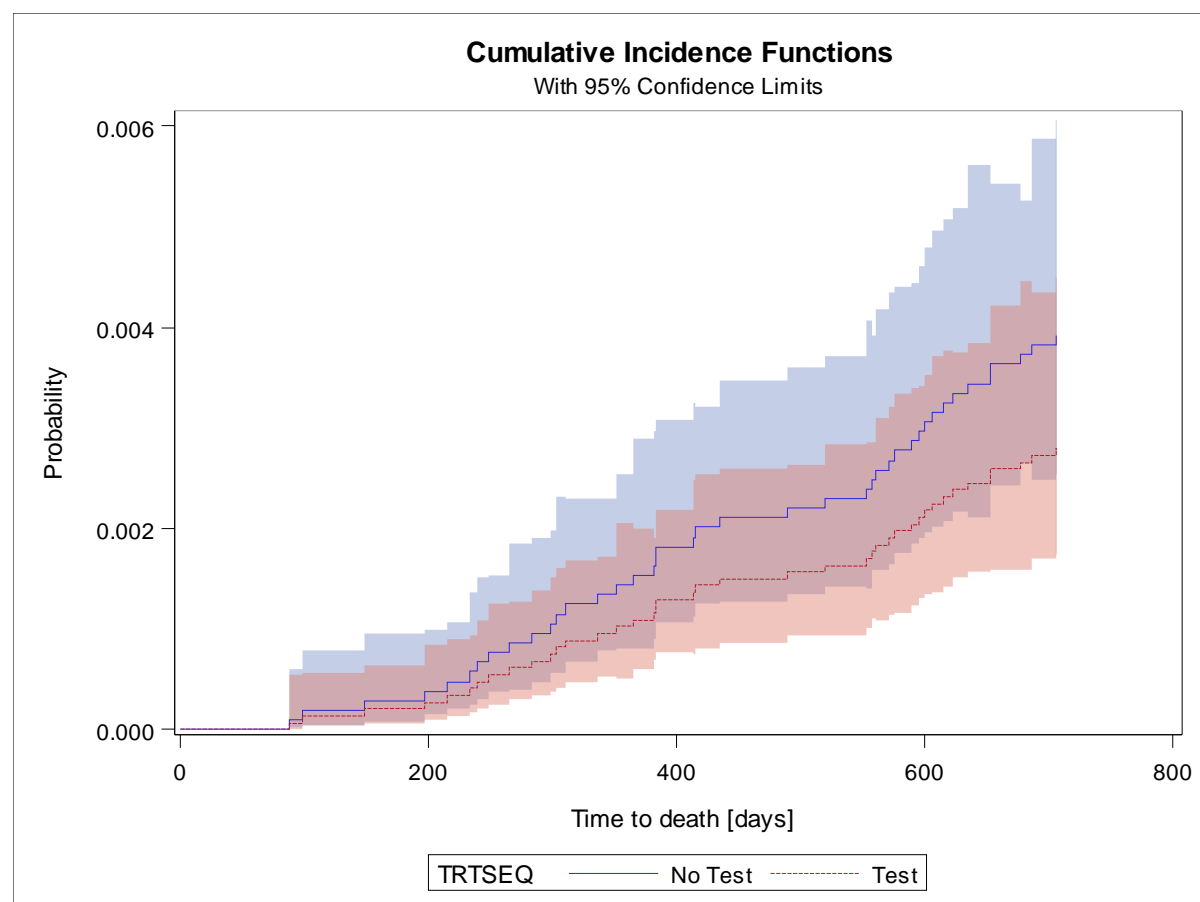

#### Lung cancer death reported in the 2 years since randomisation?

| Variable | No Test |          | Test |          | Total |          |
|----------|---------|----------|------|----------|-------|----------|
|          | N       | (%)      | N    | (%)      | N     | (%)      |
| No       | 6097    | (99.6%)  | 6070 | (99.7%)  | 12167 | (99.7%)  |
| Yes      | 24      | (0.4%)   | 17   | (0.3%)   | 41    | (0.3%)   |
| Total    | 6121    | (100.0%) | 6087 | (100.0%) | 12208 | (100.0%) |

| Chi-Square Statistics       |        |         |
|-----------------------------|--------|---------|
| Statistic                   | Value  | p-Value |
| Chi-Square                  | 1.1604 | 0.2814  |
| Continuity Adj. Chi-Square  | 0.8478 | 0.3572  |
| Likelihood Ratio Chi-Square | 1.1662 | 0.2802  |
| Mantel-Haenszel Chi-Square  | 1.1603 | 0.2814  |

| Fisher's Exact Test   |        |
|-----------------------|--------|
| Left-sided Pr <= F    | 0.1787 |
| Right-sided Pr >= F   | 0.8916 |
| Table Probability (P) | 0.0703 |
| Two-sided Pr <= P     | 0.3482 |

| Analysis of Maximum Likelihood Estimates |                    |                |              |         |
|------------------------------------------|--------------------|----------------|--------------|---------|
|                                          |                    |                | Type 3 Tests |         |
| Parameter                                | Parameter Estimate | Standard Error | Chi-Square   | p-value |
| Group allocation Test                    | -0.340             | 0.317          | 1.1509       | 0.2834  |

|                       |              | Confidence Interval |       |
|-----------------------|--------------|---------------------|-------|
| Parameter             | Hazard Ratio | lower               | upper |
| Group allocation Test | 0.712        | 0.382               | 1.325 |

| Analysis of Maximum Likelihood Estimates |                    |                |              |         |                  |
|------------------------------------------|--------------------|----------------|--------------|---------|------------------|
|                                          |                    |                | Type 3 Tests |         |                  |
| Parameter                                | Parameter Estimate | Standard Error | Chi-Square   | p-value | adjusted p-value |
| Age [years]                              | 0.127              | 0.026          | 23.1273      | <.0001  | <.0001           |
| Pack year history                        | 0.016              | 0.004          | 21.5281      | <.0001  | <.0001           |
| Random Factor Practice                   |                    |                | 2.5531       |         | 0.3744           |
| Gender Male                              | 0.121              | 0.329          | 0.1358       | 0.7125  | 0.7122           |
| Smoking status Ex-smoker                 | -0.924             | 0.340          | 7.3666       | 0.0066  | 0.0066           |
| Group allocation Test                    | -0.330             | 0.318          | 1.0805       | 0.2986  | 0.2985           |

|                          |              | Confidence Interval |       |
|--------------------------|--------------|---------------------|-------|
| Parameter                | Hazard Ratio | lower               | upper |
| Age [years]              | 1.135        | 1.078               | 1.195 |
| Pack year history        | 1.016        | 1.009               | 1.023 |
| Random Factor Practice   |              |                     |       |
| Gender Male              | 1.129        | 0.592               | 2.154 |
| Smoking status Ex-smoker | 0.397        | 0.204               | 0.774 |
| Group allocation Test    | 0.719        | 0.386               | 1.340 |

## Secondary Outcome Analysis 2: Cancer Mortality Two Years After Randomisation

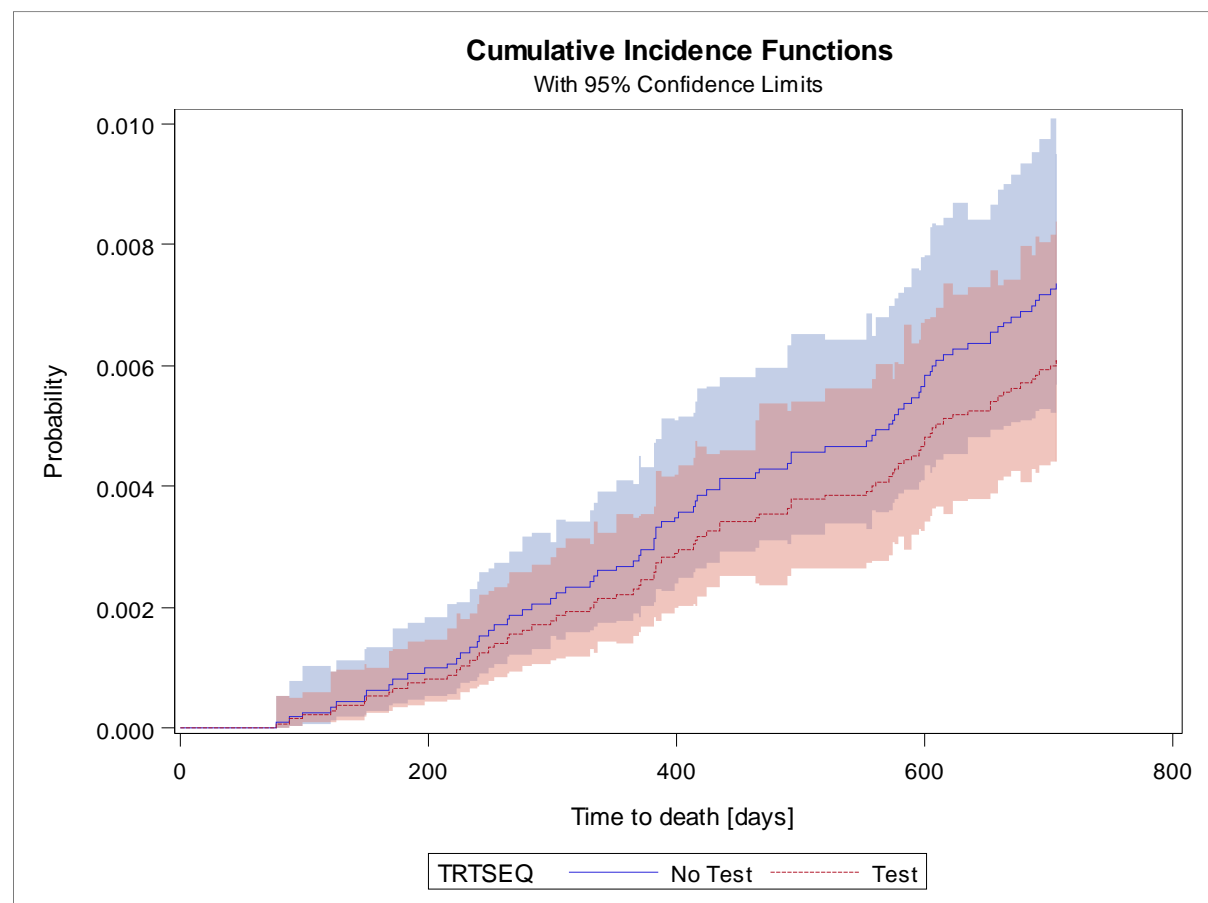

### Any cancer death reported in the 2 years since randomisation?

|          | No Test |          | Test |          | Total |          |
|----------|---------|----------|------|----------|-------|----------|
| Variable | N       | (%)      | N    | (%)      | N     | (%)      |
| No       | 6076    | (99.3%)  | 6050 | (99.4%)  | 12126 | (99.3%)  |
| Yes      | 45      | (0.7%)   | 37   | (0.6%)   | 82    | (0.7%)   |
| Total    | 6121    | (100.0%) | 6087 | (100.0%) | 12208 | (100.0%) |

| Chi-Square Statistics       |        |         |
|-----------------------------|--------|---------|
| Statistic                   | Value  | p-Value |
| Chi-Square                  | 0.7415 | 0.3892  |
| Continuity Adj. Chi-Square  | 0.5630 | 0.4531  |
| Likelihood Ratio Chi-Square | 0.7428 | 0.3888  |
| Mantel-Haenszel Chi-Square  | 0.7415 | 0.3892  |

| Fisher's Exact Test   |        |
|-----------------------|--------|
| Left-sided Pr <= F    | 0.2266 |
| Right-sided Pr >= F   | 0.8344 |
| Table Probability (P) | 0.0611 |
| Two-sided Pr <= P     | 0.4383 |

| Analysis of Maximum Likelihood Estimates |                    |                |              |         |
|------------------------------------------|--------------------|----------------|--------------|---------|
|                                          |                    |                | Type 3 Tests |         |
| Parameter                                | Parameter Estimate | Standard Error | Chi-Square   | p-value |
| Group allocation Test                    | -0.191             | 0.222          | 0.7400       | 0.3897  |

|                       |              | Confidence Interval |       |
|-----------------------|--------------|---------------------|-------|
| Parameter             | Hazard Ratio | lower               | upper |
| Group allocation Test | 0.826        | 0.535               | 1.276 |

| Analysis of Maximum Likelihood Estimates |                    |                |              |         |
|------------------------------------------|--------------------|----------------|--------------|---------|
|                                          |                    |                | Type 3 Tests |         |
| Parameter                                | Parameter Estimate | Standard Error | Chi-Square   | p-value |
| Age [years]                              | 0.098              | 0.018          | 30.4475      | <.0001  |
| Pack year history                        | 0.011              | 0.004          | 10.0361      | 0.0015  |
| Gender Male                              | 0.286              | 0.232          | 1.5111       | 0.2190  |
| Smoking status Ex-smoker                 | -0.859             | 0.240          | 12.7782      | 0.0004  |
| Group allocation Test                    | -0.191             | 0.222          | 0.7366       | 0.3907  |

|                          |              | Confidence Interval |       |
|--------------------------|--------------|---------------------|-------|
| Parameter                | Hazard Ratio | lower               | upper |
| Age [years]              | 1.103        | 1.065               | 1.142 |
| Pack year history        | 1.011        | 1.004               | 1.019 |
| Gender Male              | 1.331        | 0.844               | 2.099 |
| Smoking status Ex-smoker | 0.424        | 0.265               | 0.679 |
| Group allocation Test    | 0.827        | 0.535               | 1.277 |

## Secondary Outcome Analysis 3: All-Cause Mortality Two Years After Randomisation

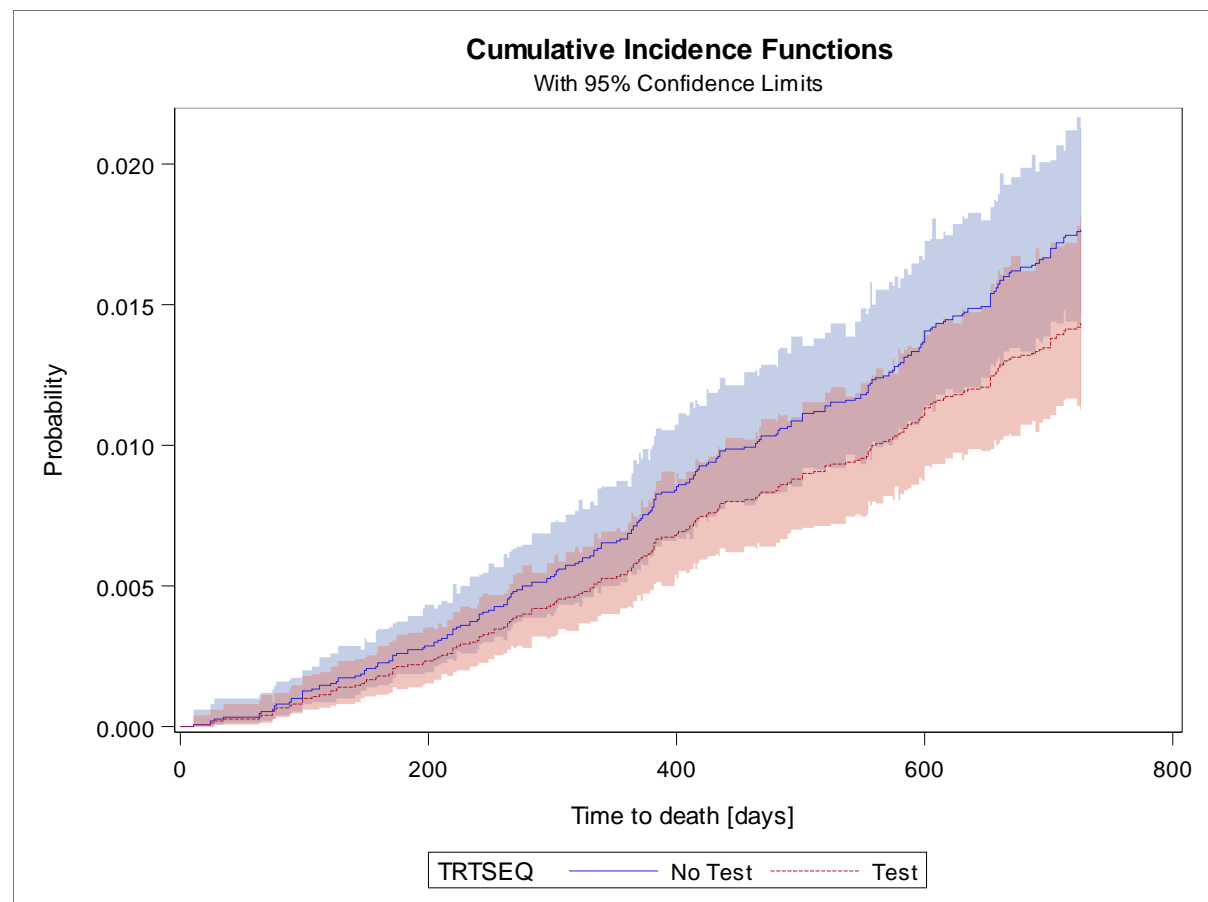

### Any cause death reported in the 2 years since randomisation?

|          | No Test |          | Test |          | Total |          |
|----------|---------|----------|------|----------|-------|----------|
| Variable | N       | (%)      | N    | (%)      | N     | (%)      |
| No       | 6013    | (98.2%)  | 6000 | (98.6%)  | 12013 | (98.4%)  |
| Yes      | 108     | (1.8%)   | 87   | (1.4%)   | 195   | (1.6%)   |
| Total    | 6121    | (100.0%) | 6087 | (100.0%) | 12208 | (100.0%) |

| Chi-Square Statistics       |        |         |
|-----------------------------|--------|---------|
| Statistic                   | Value  | p-Value |
| Chi-Square                  | 2.1809 | 0.1397  |
| Continuity Adj. Chi-Square  | 1.9729 | 0.1601  |
| Likelihood Ratio Chi-Square | 2.1853 | 0.1393  |
| Mantel-Haenszel Chi-Square  | 2.1808 | 0.1397  |

| Fisher's Exact Test   |        |
|-----------------------|--------|
| Left-sided Pr <= F    | 0.0800 |
| Right-sided Pr >= F   | 0.9394 |
| Table Probability (P) | 0.0194 |
| Two-sided Pr <= P     | 0.1489 |

| Analysis of Maximum Likelihood Estimates |                    |                |              |         |
|------------------------------------------|--------------------|----------------|--------------|---------|
|                                          |                    |                | Type 3 Tests |         |
| Parameter                                | Parameter Estimate | Standard Error | Chi-Square   | p-value |
| Group allocation Test                    | -0.212             | 0.144          | 2.1735       | 0.1404  |

|                       |              | Confidence Interval |       |
|-----------------------|--------------|---------------------|-------|
| Parameter             | Hazard Ratio | lower               | upper |
| Group allocation Test | 0.809        | 0.610               | 1.072 |

| Analysis of Maximum Likelihood Estimates |                    |                |              |         |                  |
|------------------------------------------|--------------------|----------------|--------------|---------|------------------|
|                                          |                    |                | Type 3 Tests |         |                  |
| Parameter                                | Parameter Estimate | Standard Error | Chi-Square   | p-value | adjusted p-value |
| Age [years]                              | 0.070              | 0.011          | 38.4582      | <.0001  | <.0001           |
| Pack year history                        | 0.010              | 0.003          | 14.9175      | 0.0001  | 0.0001           |
| Random Factor Practice                   |                    |                | 14.3637      |         | 0.3422           |
| Gender Male                              | 0.486              | 0.154          | 10.0249      | 0.0015  | 0.0015           |
| Smoking status Ex-smoker                 | -0.679             | 0.153          | 19.6351      | <.0001  | <.0001           |
| Group allocation Test                    | -0.212             | 0.144          | 2.1549       | 0.1421  | 0.1420           |

|                          |              | Confidence Interval |       |
|--------------------------|--------------|---------------------|-------|
| Parameter                | Hazard Ratio | lower               | upper |
| Age [years]              | 1.072        | 1.049               | 1.096 |
| Pack year history        | 1.010        | 1.005               | 1.015 |
| Random Factor Practice   |              |                     |       |
| Gender Male              | 1.626        | 1.203               | 2.197 |
| Smoking status Ex-smoker | 0.507        | 0.375               | 0.685 |
| Group allocation Test    | 0.809        | 0.610               | 1.073 |
