# Supplementary material
Source: HighWire-hosted journal article supplement (https://erj.ersjournals.com/content/57/1/2000670)
Supplement: inline-supplementary-material-3 [file inline-supplementary-material-3.pdf]

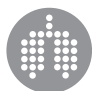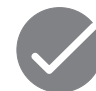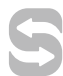

SHAREABLE PDF

# Earlier diagnosis of lung cancer in a randomised trial of an autoantibody blood test followed by imaging

Frank M. Sullivan<sup>1</sup>, Frances S. Mair<sup>2</sup>, William Anderson<sup>3</sup>, Pauline Armory<sup>4</sup>, Andrew Briggs<sup>5</sup>, Cindy Chew<sup>6</sup>, Alistair Dorward<sup>7</sup>, John Haughney<sup>8</sup>, Fiona Hogarth<sup>4</sup>, Denise Kendrick<sup>9</sup>, Roberta Littleford<sup>10</sup>, Alex McConnachie<sup>2</sup>, Colin McCowan<sup>1</sup>, Nicola McMeekin<sup>2</sup>, Manish Patel<sup>11</sup>, Petra Rauchhaus<sup>4</sup>, Lewis Ritchie<sup>12</sup>, Chris Robertson<sup>13</sup>, John Robertson<sup>9</sup>, Jose Robles-Zurita<sup>2</sup>, Joseph Sarvesvaran<sup>7</sup>, Herbert Sewell<sup>14</sup>, Michael Sproule<sup>15</sup>, Thomas Taylor<sup>16</sup>, Agnes Tello<sup>1</sup>, Shaun Treweek<sup>17</sup>, Kavita Vedhara<sup>9</sup> and Stuart Schembri<sup>3</sup> on behalf of the Early Diagnosis of Lung Cancer Scotland (ECLS) Team

**Affiliations:** <sup>1</sup>School of Medicine, University of St Andrews, St Andrews, UK. <sup>2</sup>Institute of Health and Wellbeing, University of Glasgow, Glasgow, UK. <sup>3</sup>Respiratory Medicine, NHS Tayside, Dundee, UK. <sup>4</sup>Tayside Clinical Trials Unit, University of Dundee, Dundee, UK. <sup>5</sup>Dept of Health Services Research and Policy, London School of Hygiene and Tropical Medicine, London, UK. <sup>6</sup>Radiology, NHS Lanarkshire, Bothwell, UK. <sup>7</sup>Respiratory Medicine, NHS Greater Glasgow and Clyde, Glasgow, UK. <sup>8</sup>General Practice, NHS Greater Glasgow and Clyde, Glasgow, UK. <sup>9</sup>School of Medicine, University of Nottingham, Nottingham, UK. <sup>10</sup>Centre for Clinical Research, University of Queensland, Saint Lucia, Australia. <sup>11</sup>Respiratory Medicine, NHS Lanarkshire, Bothwell, UK. <sup>12</sup>The Institute of Applied Health Sciences, University of Aberdeen, Aberdeen, UK. <sup>13</sup>Dept of Mathematics and Statistics, University of Strathclyde, Glasgow, UK. <sup>14</sup>School of Life Sciences, University of Nottingham, Nottingham, UK. <sup>15</sup>Radiology, NHS Greater Glasgow and Clyde, Glasgow, UK. <sup>16</sup>Radiology, NHS Tayside, Dundee, UK. <sup>17</sup>Health Services Research Unit, University of Aberdeen, Aberdeen, UK.

**Correspondence:** Frank M. Sullivan, School of Medicine, Medical and Biological Sciences Building, University of St Andrews, North Haugh, St Andrews, KY16 9TF, UK. E-mail: fms20@st-andrews.ac.uk

@ERSpublications

**A positive EarlyCDT-Lung test, followed by CT, significantly reduced the numbers of late-stage cancers: performance of the blood test should be assessed further in a screening study where all eligible participants in the intervention arm have a CT scan** <https://bit.ly/32maUrB>

**Cite this article as:** Sullivan FM, Mair FS, Anderson W, *et al.* Earlier diagnosis of lung cancer in a randomised trial of an autoantibody blood test followed by imaging. *Eur Respir J* 2021; 57: 2000670 [<https://doi.org/10.1183/13993003.00670-2020>].

This single-page version can be shared freely online.

**ABSTRACT** The EarlyCDT-Lung test is a high-specificity blood-based autoantibody biomarker that could contribute to predicting lung cancer risk. We report on the results of a phase IV biomarker evaluation of whether using the EarlyCDT-Lung test and any subsequent computed tomography (CT) scanning to identify those at high risk of lung cancer reduces the incidence of patients with stage III/IV/unspecified lung cancer at diagnosis compared with the standard clinical practice at the time the study began.

The Early Diagnosis of Lung Cancer Scotland (ECLS) trial was a randomised controlled trial of 12208 participants at risk of developing lung cancer in Scotland in the UK. The intervention arm received the EarlyCDT-Lung test and, if test-positive, low-dose CT scanning 6-monthly for up to 2 years. EarlyCDT-Lung test-negative and control arm participants received standard clinical care. Outcomes were assessed at 2 years post-randomisation using validated data on cancer occurrence, cancer staging, mortality and comorbidities.

At 2 years, 127 lung cancers were detected in the study population (1.0%). In the intervention arm, 33 out of 56 (58.9%) lung cancers were diagnosed at stage III/IV compared with 52 out of 71 (73.2%) in the

control arm. The hazard ratio for stage III/IV presentation was 0.64 (95% CI 0.41–0.99). There were nonsignificant differences in lung cancer and all-cause mortality after 2 years.

ECLS compared EarlyCDT-Lung plus CT screening to standard clinical care (symptomatic presentation) and was not designed to assess the incremental contribution of the EarlyCDT-Lung test. The observation of a stage shift towards earlier-stage lung cancer diagnosis merits further investigations to evaluate whether the EarlyCDT-Lung test adds anything to the emerging standard of low-dose CT.
